# Supplementary material for: Association between Harmful and Addictive Perceptions of E-Cigarettes and E-Cigarette Use among Adolescents and Youth—A Systematic Review and Meta-Analysis
Source: MDPI journal article supplement (doi:10.3390/children9111678), 2022-10-31
Supplement: s1 [file s1]

## Supplementary Materials

**Supplementary Table S1.** Details of PubMed search strategy.

| Focus           | Operator         | Search Terms                                                                                                                                                                                                                                                                                                                                                                                                                                                                                                                                                                                                        |
|-----------------|------------------|---------------------------------------------------------------------------------------------------------------------------------------------------------------------------------------------------------------------------------------------------------------------------------------------------------------------------------------------------------------------------------------------------------------------------------------------------------------------------------------------------------------------------------------------------------------------------------------------------------------------|
| #1 Youth        | Keywords         | ((((((((((((((((((("young adult"[MeSH Terms]) OR adolescent[MeSH Terms]) OR adolescence[MeSH Terms]) OR "Secondary School"[MeSH Terms]) OR "young adult*"[Title/Abstract]) OR youth*[Title/Abstract]) OR adolesc*[Title/Abstract]) OR teen*[Title/Abstract] OR "Secondary School"[Title/Abstract]) OR "Secondary School*"[Title/Abstract]) OR "Secondary School Children"[Title/Abstract]) OR "middle school children"[Title/Abstract]) OR "high school children"[Title/Abstract]) OR "college student*"[Title/Abstract]) OR "university student*"[Title/Abstract]))))))))))))                                      |
| #2 Perception   | Keywords         | ((((((((((((((((((("perception"[MeSH Terms]) OR "thinking"[MeSH Terms]) OR "critical thinking"[MeSH Terms]) OR perceiv*[Title/Abstract]) OR perception*[Title/Abstract]) OR perspective[Title/Abstract]) OR opinion*[Title/Abstract]) OR view[Title/Abstract]) OR view-point*[Title/Abstract]) OR thinking*[Title/Abstract]) OR "thinking skill*"[Title/Abstract]) OR thought*[Title/Abstract]) OR "critical thinking*"[Title/Abstract]) OR impression*[Title/Abstract]) OR attitude[Title/Abstract]))))))))))))                                                                                                    |
| #3 E-cigarettes | Keywords         | ((((((((((((((((((("electronic nicotine delivery systems"[MeSH Terms]) OR e-cigarettes[MeSH Terms]) OR "cigarettes, electronic"[MeSH Terms]) OR vaping[MeSH Terms]) OR "electronic cigarette*"[Title/Abstract]) OR "electronic nicotine delivery systems"[Title/Abstract]) OR ENDS[Title/Abstract]) OR e-cigarette*[Title/Abstract]) OR "e cigarette*"[Title/Abstract]) OR e-cig*[Title/Abstract]) OR "e cig*"[Title/Abstract]) OR vap*[Title/Abstract]) OR "E-Cigarette Use*"[Title/Abstract]) OR "E Cigarette Use*"[Title/Abstract]) OR "E-Cig Use*"[Title/Abstract]) OR "E Cig Use*"[Title/Abstract])))))))))))) |
| #4              | Boolean Operator | #1 AND #2 AND #3                                                                                                                                                                                                                                                                                                                                                                                                                                                                                                                                                                                                    |
| #5              | Limits           | #4 Filters activated: Humans, English, Child: birth-18 years, Adult: 19+ years, Adult: 19-44 years, Child: 6-12 years, Young Adult: 19-24 years, Adolescent: 13-18 years                                                                                                                                                                                                                                                                                                                                                                                                                                            |

**Supplementary Table S2** Risk of bias of cross-sectional studies based on AHRQ tool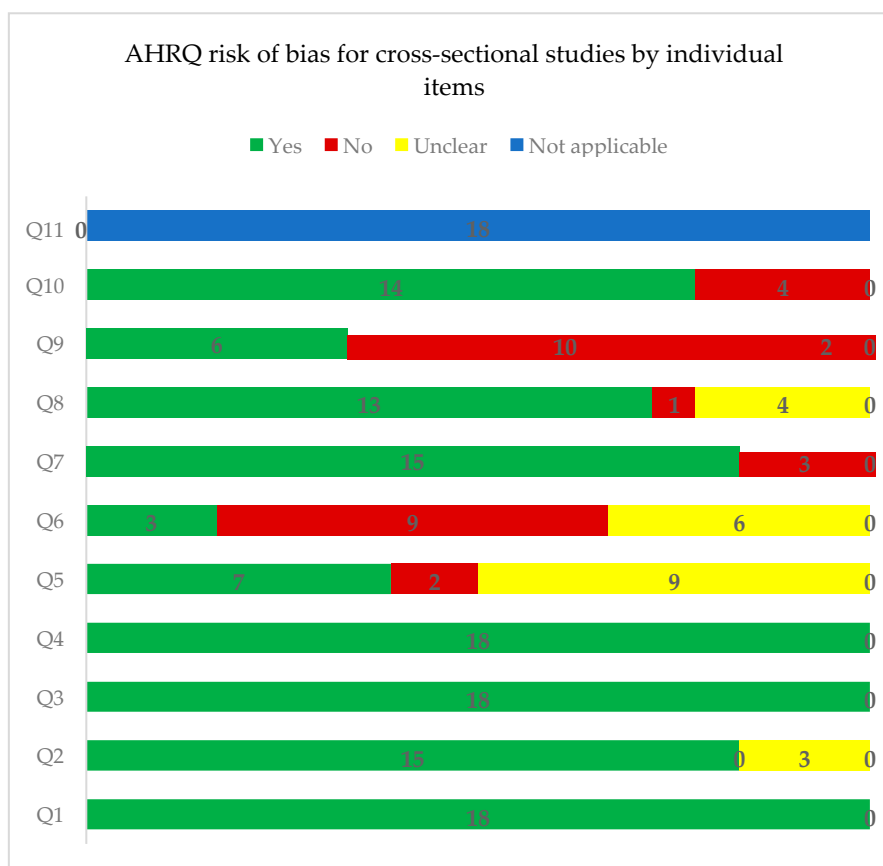

Note: Selection bias (Q1–Q4), performance bias (Q5, Q6), attrition bias (Q7), detection bias (Q8, Q9) and reporting bias (Q10, Q11)

**Supplementary Table S3** Risk of bias of cohort studies based on NOS tool

| Study ID             | Representative-ness of the cohort | Selection of the non-exposed cohort | Ascertainment of exposure | Outcome of interest was not present at start | Compa-rability* | Assess-ment of outco-me | Follow-up long enough for outcomes | Adequacy of follow up | Score | Quality  |
|----------------------|-----------------------------------|-------------------------------------|---------------------------|----------------------------------------------|-----------------|-------------------------|------------------------------------|-----------------------|-------|----------|
| Andrews et al., 2016 | *                                 | *                                   | -                         | -                                            | -               | -                       | *                                  | *                     | 4     | Moderate |
| Cooper et al., 2018  | *                                 | *                                   | -                         | *                                            | *               | -                       | *                                  | *                     | 7     | High     |

## (a) Perceived harmfulness (disagree vs agree)

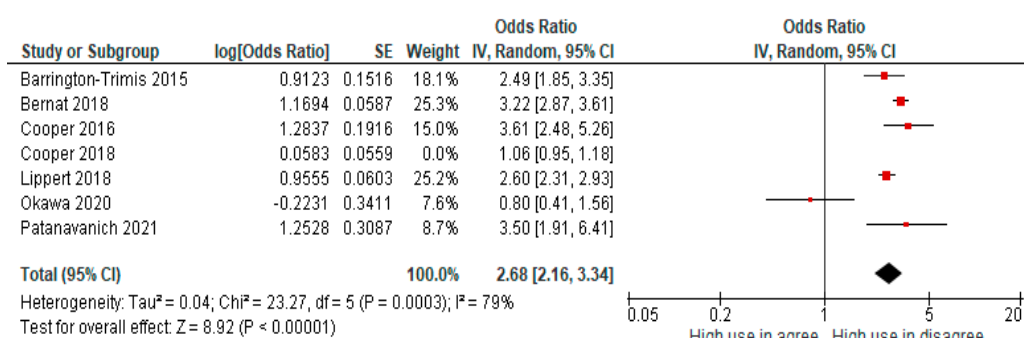

## (b) Perceived harmfulness (less harmful vs equal harmful)

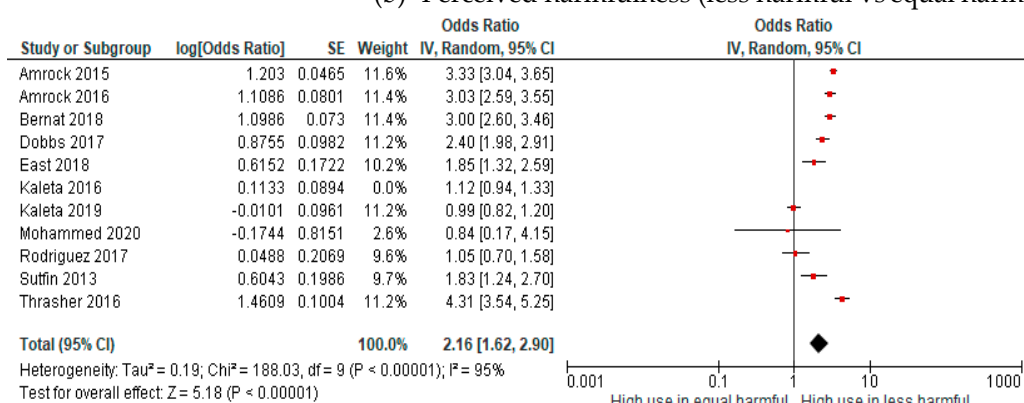

## (c) Perceived harmfulness (more harmful vs equal harmful)

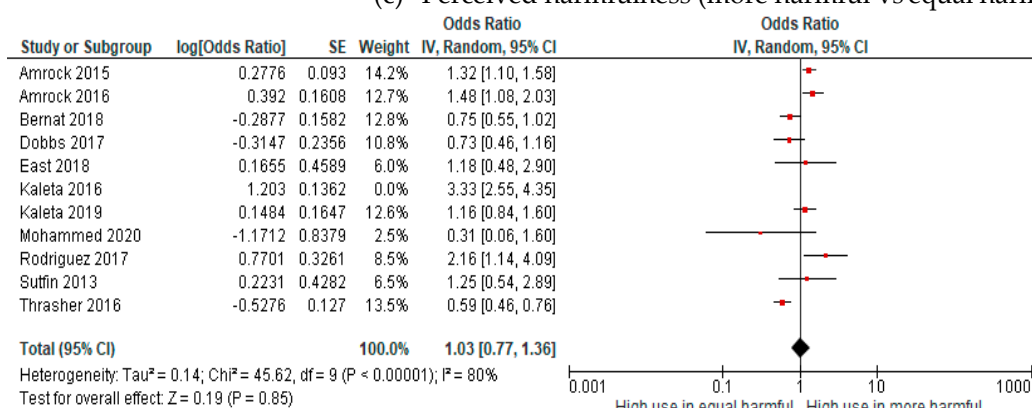

## (d) Perceived addictiveness (disagree vs agree)

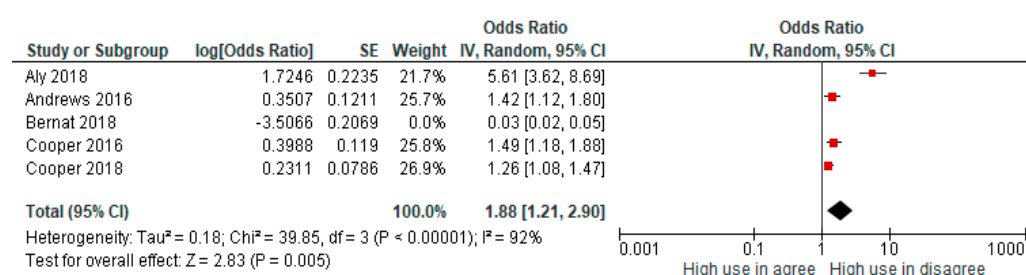

## (e) Perceived addictiveness (less addictive vs equal addictive)

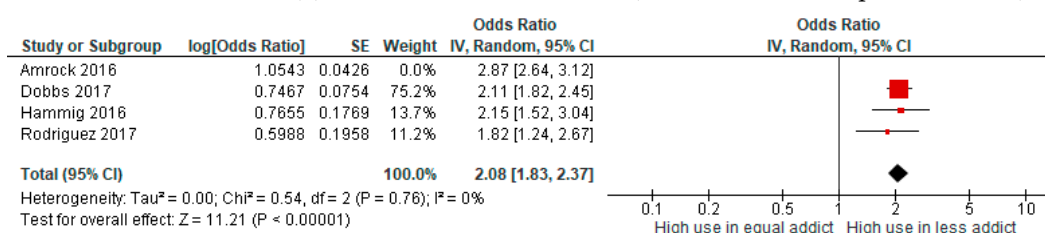

## (f) Perceived addictiveness (more addictive vs equal addictive)

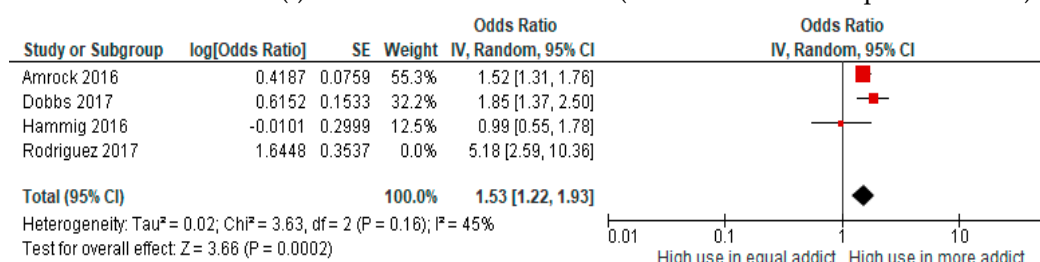

**Figure S1** Forest plot of the meta-analysis for perceived risks, (a-c) perceived harmfulness, (d-f) perceived addictiveness and ever e-cigarettes use in young people after sensitivity analysis. Each study is identified by their first author. The individual effect estimates is identified as odds ratios with lower and upper limits (95% confidence interval)

**Supplementary Table S4** Quality assessment of the present review (GRADE Evidence Profile)

| Certainty assessment                                                                                                            |                       |              |                      |              |             |                      | № of patients                     |                                | Effect                    |                                                | Certainty        | Importance |
|---------------------------------------------------------------------------------------------------------------------------------|-----------------------|--------------|----------------------|--------------|-------------|----------------------|-----------------------------------|--------------------------------|---------------------------|------------------------------------------------|------------------|------------|
| No of studies                                                                                                                   | Study design          | Risk of bias | Inconsistency        | Indirectness | Imprecision | Other considerations | Disagree to perceived harmfulness | Agree to perceived harmfulness | Relative (95% CI)         | Absolute (95% CI)                              |                  |            |
| Question: Should disagree vs. agree to perceived harmfulness be used for preventing e-cigarette use in young people?            |                       |              |                      |              |             |                      |                                   |                                |                           |                                                |                  |            |
| 7                                                                                                                               | observational studies | not serious  | serious <sup>a</sup> | not serious  | not serious | Strong association   |                                   |                                | OR 2.20<br>(1.41 to 3.43) | 2 fewer per 1,000<br>(from 3 fewer to 1 fewer) | ⊕⊕○○<br>LOW      |            |
| Certainty assessment                                                                                                            |                       |              |                      |              |             |                      | № of patients                     |                                | Effect                    |                                                | Certainty        | Importance |
| No of studies                                                                                                                   | Study design          | Risk of bias | Inconsistency        | Indirectness | Imprecision | Other considerations | Perceived less harmful            | Perceived equally harmful      | Relative (95% CI)         | Absolute (95% CI)                              |                  |            |
| Question: Should less harmful vs. equally harmful to tobacco cigarettes be used for preventing e-cigarette use in young people? |                       |              |                      |              |             |                      |                                   |                                |                           |                                                |                  |            |
| 11                                                                                                                              | observational studies | not serious  | serious <sup>a</sup> | not serious  | not serious | strong association   |                                   |                                | OR 2.01<br>(1.47 to 2.75) | 2 fewer per 1,000<br>(from 3 fewer to 1 fewer) | ⊕⊕○○<br>LOW      |            |
| Certainty assessment                                                                                                            |                       |              |                      |              |             |                      | № of patients                     |                                | Effect                    |                                                | Certainty        | Importance |
| No of studies                                                                                                                   | Study design          | Risk of bias | Inconsistency        | Indirectness | Imprecision | Other considerations | Perceived more harmful            | Perceived equally harmful      | Relative (95% CI)         | Absolute (95% CI)                              |                  |            |
| Question: Should more harmful vs. equally harmful to tobacco cigarettes be used for preventing e-cigarette use in young people? |                       |              |                      |              |             |                      |                                   |                                |                           |                                                |                  |            |
| 11                                                                                                                              | observational studies | not serious  | serious <sup>a</sup> | not serious  | not serious | none                 |                                   |                                | OR 1.16<br>(0.80 to 1.68) | 1 fewer per 1,000<br>(from 2 fewer to 1 fewer) | ⊕○○○<br>VERY LOW |            |

| Certainty assessment                                                                                                                |                       |              |                      |              |             |                      | № of patients                       |                                  | Effect                    |                                                | Certainty        | Importance |
|-------------------------------------------------------------------------------------------------------------------------------------|-----------------------|--------------|----------------------|--------------|-------------|----------------------|-------------------------------------|----------------------------------|---------------------------|------------------------------------------------|------------------|------------|
| No of studies                                                                                                                       | Study design          | Risk of bias | Inconsistency        | Indirectness | Imprecision | Other considerations | Disagree to perceived addictiveness | Agree to perceived addictiveness | Relative (95% CI)         | Absolute (95% CI)                              |                  |            |
| Question: Should disagree vs. agree to perceived addictiveness be used for preventing e-cigarette use in young people?              |                       |              |                      |              |             |                      |                                     |                                  |                           |                                                |                  |            |
| 5                                                                                                                                   | observational studies | not serious  | serious <sup>a</sup> | not serious  | not serious | none                 |                                     |                                  | OR 0.86<br>(0.29 to 2.56) | 1 fewer per 1,000<br>(from 3 fewer to 0 fewer) | ⊕○○○<br>VERY LOW |            |
| Certainty assessment                                                                                                                |                       |              |                      |              |             |                      | № of patients                       |                                  | Effect                    |                                                | Certainty        | Importance |
| No of studies                                                                                                                       | Study design          | Risk of bias | Inconsistency        | Indirectness | Imprecision | Other considerations | Perceived less addictive            | Perceived equally addictive      | Relative (95% CI)         | Absolute (95% CI)                              |                  |            |
| Question: Should less addictive vs. equally addictive to tobacco cigarettes be used for preventing e-cigarette use in young people? |                       |              |                      |              |             |                      |                                     |                                  |                           |                                                |                  |            |
| 4                                                                                                                                   | observational studies | not serious  | serious <sup>a</sup> | not serious  | not serious | strong association   | 0/0                                 | 0/0                              | OR 2.28<br>(1.81 to 2.88) | 2 fewer per 1,000<br>(from 3 fewer to 2 fewer) | ⊕⊕○○<br>LOW      |            |
| Certainty assessment                                                                                                                |                       |              |                      |              |             |                      | № of patients                       |                                  | Effect                    |                                                | Certainty        | Importance |
| No of studies                                                                                                                       | Study design          | Risk of bias | Inconsistency        | Indirectness | Imprecision | Other considerations | Perceived more addictive            | Perceived equally addictive      | Relative (95% CI)         | Absolute (95% CI)                              |                  |            |
| Question: Should more addictive vs. equally addictive to tobacco cigarettes be used for preventing e-cigarette use in young people? |                       |              |                      |              |             |                      |                                     |                                  |                           |                                                |                  |            |
| 4                                                                                                                                   | observational studies | not serious  | serious <sup>a</sup> | not serious  | not serious | none                 | 0/0                                 | 0/0                              | OR 1.82<br>(1.22 to 2.73) | 2 fewer per 1,000<br>(from 3 fewer to 1 fewer) | ⊕○○○<br>VERY LOW |            |

**Question:** Perceived harmfulness compared to traditional cigarettes (**perceived risk**) for preventing ever e-cigarette use across **age group**

| Certainty assessment                                                                                                                                                                                                                                                                                                                                                                                                                                                                                                        |                       |              |                      |              |             |                      | № of patients         |              | Effect                    |                                                | Certainty        | Importance |
|-----------------------------------------------------------------------------------------------------------------------------------------------------------------------------------------------------------------------------------------------------------------------------------------------------------------------------------------------------------------------------------------------------------------------------------------------------------------------------------------------------------------------------|-----------------------|--------------|----------------------|--------------|-------------|----------------------|-----------------------|--------------|---------------------------|------------------------------------------------|------------------|------------|
| No of studies                                                                                                                                                                                                                                                                                                                                                                                                                                                                                                               | Study design          | Risk of bias | Inconsistency        | Indirectness | Imprecision | Other considerations | Perceived harmfulness | [comparison] | Relative (95% CI)         | Absolute (95% CI)                              |                  |            |
| Perceived less harmful and ever e-cigarette use (Adolescents)                                                                                                                                                                                                                                                                                                                                                                                                                                                               |                       |              |                      |              |             |                      |                       |              |                           |                                                |                  |            |
| 9                                                                                                                                                                                                                                                                                                                                                                                                                                                                                                                           | observational studies | not serious  | serious <sup>a</sup> | not serious  | not serious | strong association   |                       |              | OR 2.18<br>(1.55 to 3.07) | 2 fewer per 1,000<br>(from 3 fewer to 2 fewer) | ⊕⊕○○<br>LOW      |            |
| Perceived less harmful and ever e-cigarette use (Young Adults)                                                                                                                                                                                                                                                                                                                                                                                                                                                              |                       |              |                      |              |             |                      |                       |              |                           |                                                |                  |            |
| 2                                                                                                                                                                                                                                                                                                                                                                                                                                                                                                                           | observational studies | not serious  | not serious          | not serious  | not serious | none                 |                       |              | OR 1.39<br>(0.81 to 2.40) | 1 fewer per 1,000<br>(from 2 fewer to 1 fewer) | ⊕⊕○○<br>LOW      |            |
| Perceived more harmful and ever e-cigarette use (Adolescents)                                                                                                                                                                                                                                                                                                                                                                                                                                                               |                       |              |                      |              |             |                      |                       |              |                           |                                                |                  |            |
| 9                                                                                                                                                                                                                                                                                                                                                                                                                                                                                                                           | observational studies | not serious  | serious <sup>a</sup> | not serious  | not serious | none                 |                       |              | OR 1.08<br>(0.72 to 1.63) | 1 fewer per 1,000<br>(from 2 fewer to 1 fewer) | ⊕○○○<br>VERY LOW |            |
| Perceived more harmful and ever e-cigarette use (Young Adults)                                                                                                                                                                                                                                                                                                                                                                                                                                                              |                       |              |                      |              |             |                      |                       |              |                           |                                                |                  |            |
| 2                                                                                                                                                                                                                                                                                                                                                                                                                                                                                                                           | observational studies | not serious  | not serious          | not serious  | not serious | none                 |                       |              | OR 1.76<br>(1.05 to 2.96) | 2 fewer per 1,000<br>(from 3 fewer to 1 fewer) | ⊕⊕○○<br>LOW      |            |
| GRADE Working Group grades of evidence<br>High quality: Further research is very unlikely to change our confidence in the estimate of effect<br>Moderate quality: Further research is likely to have an important impact on our confidence in the estimate of effect and may change the estimate<br>Low quality: Further research is very likely to have an important impact on our confidence in the estimate of effect and is likely to change the estimate<br>Very low quality: We are very uncertain about the estimate |                       |              |                      |              |             |                      |                       |              |                           |                                                |                  |            |

CI: Confidence interval; OR: Odds ratio

a. The quality of evidence was downgraded due to considerable heterogeneity; majority of studies are cross-sectional studies
